# Effects of Parental Migration on Early Childhood Development of Left-Behind Children in Bangladesh: Evidence from a Nationally Representative Survey

Shimlin Jahan Khanam, Md Nuruzzaman Khan

Jatiya Kabi Kazi Nazrul Islam University, Mymensingh, Bangladesh.

**Running title:** Parental migration and early childhood development.

Corresponding author,

Shimlin Jahan Khanam

Lecturer

Department of Population Science

Jatiya Kabi Kazi Nazrul Islam University, Mymensingh, Bangladesh.

Email: [shimlinjahan2208@gmail.com](mailto:shimlinjahan2208@gmail.com)

## Abstract

**Background:** In Bangladesh, as in other low- and middle-income countries, parents frequently migrate to other areas, often for employment opportunities, leaving their children behind with the hope that their earnings will contribute to securing a better future for them. However, the absence of parents due to migration can have negative implications for the well-being of these left-behind children. Despite the existence of studies investigating this phenomenon, the evidence thus far has produced inconclusive findings, with no specific data available from Bangladesh. Therefore, the objective of this study was to examine the effects of parental migration on the early childhood development of left-behind children in Bangladesh.

**Methods:** The present study utilized data from the Bangladesh Multiple Indicator Cluster Survey (MICS) conducted in 2019. A sample of 8833 children aged 36-48 months was included in the analysis. The Early Childhood Development Index (ECDI) and its individual domains served as the outcome variables of interest. The primary explanatory variables considered in the analysis were father migration, mother migration, migration of both parents, and migration of either parent. To assess the association between the outcomes and explanatory variables, multilevel logistic regression analysis was employed, controlling for relevant covariates. This analytical approach accounted for the hierarchical structure of the data and allowed for adjustments at multiple levels to obtain more accurate estimates.

**Results:** Approximately 29% of all children in the study were not developmentally on track, as measured by the ECDI. When examining the individual domains of the ECDI, only 9% of the total children demonstrated developmental progress in the learning domain. Regarding the association between parental migration and ECDI outcomes, we observed a 26% decrease in the likelihood of poor ECDI among children with a migrated father (OR: 0.74, 95% CI: 0.54-0.93). This decrease became even more pronounced, reaching 37% (OR: 0.63, 95% CI: 0.48-0.97), among children with both parents migrated, compared to children with neither parent migrated.

**Conclusion:** The findings of this study indicate that parental migration, especially when both parents are involved, has a substantial negative impact on the likelihood of achieving favourable ECDI outcomes for children in Bangladesh. To ensure the optimal development of children with migrating parents, it is crucial to strengthen early childhood development education programs and implement robust social safety nets. These efforts should specifically target the unique needs and challenges faced by children with migrated parents, providing them with the necessary support and resources for their holistic development.

**Keywords:** Parental migration, early childhood development of left-behind children, Bangladesh

## Background

The occurrence of parental migration is on the rise in numerous low- and middle-income nations, Bangladesh included, as parents frequently embark on migration journeys in pursuit of enhanced economic prospects (1, 2). These migrating parents leave behind a group of children, known as left-behind children, who are defined as individuals under 18 years of age whose parents have relocated to another place for a period exceeding six months (3). These children confront a multitude of challenges stemming from their separation from parents, social isolation, and economic disadvantage (3, 4). While migration can yield economic benefits for families remaining in the home country, the aforementioned difficulties can profoundly impact the cognitive, socio-emotional, and physical development of these children (2).

Early childhood development (ECD) is a critical period of growth and learning that sets the foundation for future success and well-being (5, 6). The acquisition of key skills such as language, motor, cognitive, and socio-emotional abilities during early childhood is crucial for children to reach their full potential (6, 7). However, left-behind children may be at a disadvantage in terms of ECD due to a range of factors such as inadequate care, poor nutrition, lack of stimulation, and social isolation (2, 7).

However, research examining the effects of parental migration on ECD outcomes for left-behind children in low- and middle-income countries (LMICs) and specifically in Bangladesh is currently limited. Previous studies have primarily focused on the impact of parental migration on children's health, education, and psychological well-being, yielding mixed findings (3, 8-12). Moreover, the few studies that have specifically explored the consequences of parental migration on ECD outcomes have encountered several limitations, such as small sample sizes and variations in the factors considered as confounders (1, 9, 12, 13). Additionally, it is essential to consider the unique cultural and social context of each country, including Bangladesh, as findings from one country may not necessarily apply to

others (2). Hence, there is a need to investigate the specific effects of parental migration on ECD outcomes for left-behind children in Bangladesh. This study aims to fill this research gap by examining the influence of parental migration on the early childhood development of left-behind children in Bangladesh, utilizing nationally representative survey data.

## **Methods**

### **Study setting and data**

The data for this study was obtained from the 2019 Multiple Indicator Cluster Survey (MICS) conducted during January to June 2019 in Bangladesh. The MICS is a nationally representative household survey that aims to gather data on various indicators related to the well-being of women and children. This survey was carried out by the Bangladesh Bureau of Statistics in collaboration with the United Nations Children's Fund (UNICEF) and other partners.

Covering all 64 districts of Bangladesh, the survey utilized a two-stage stratified cluster sampling design. In the first stage, 1,300 primary sampling units (PSUs) were selected. These PSUs were defined as either rural or urban areas with an approximate population of 200 to 300 households. The second stage involved the systematic random sampling of 28 households from each PSU, resulting in a total sample size of 36,400 households. Within these households, 24,686 eligible children were identified, and data were collected from 23,099 of these children with a response rate of 93.60%.

### **Analytical sample**

We analyzed a total of 8,833 children, with 4,513 children aged 3 years (24-36 months, N=4,513) and 4,320 children aged 4 years (37-48 months, N=4,320). This selection was based on the age group for which the ECDI-related questions were applicable, following the guidelines provided by UNICEF.

### **Outcome variable**

The study focused on the Early Childhood Development Index (ECDI), a composite measure encompassing a ten-item module across four domains: literacy-numeracy (3 items), physical (2 items),

social-emotional (3 items), and learning (2 items) (14, 15). Children were deemed on track in the literacy-numeracy domain if they achieved milestones like letter identification, reading simple words, and number recognition. For the physical domain, on-track status depended on fine motor skills and limited illness hindrance. Positive interaction with peers and non-aggressive behavior were indicators in the social-emotional domain. In the learning domain, following directions and independent task completion were considered on track. Domain indexes were calculated based on specific criteria recommended by UNICEF, with at least two positive responses needed in literacy-numeracy and social-emotional domains, two positive replies in the physical domain, and at least one positive reply in the learning domain for a positive classification (14, 15). The ECDI was then derived as the percentage of children meeting developmental milestones in at least three of these domains, distinguishing between those who were developmentally on track and those who were not. This comprehensive index is widely utilized by organizations, including UNICEF, to monitor progress towards early childhood development goals (14, 15).

### **Explanatory variable**

The primary explanatory variable examined was the parental migration status. The relevant data pertaining to parental migration status were collected during the survey by posing specific questions to eligible respondents, typically the caretakers of the children. The questions included inquiries such as "Where does the natural father of (name of the selected children) reside?" and "Where does the natural mother of (name of the selected children) reside?" If an affirmative response was recorded, additional follow-up questions were asked to determine the duration (in months) that the natural father or mother had lived away from home. Based on these responses, variables were generated to indicate father migration and mother migration, with a positive response indicating the absence of the respective parent for at least 6 months. Additionally, based on these two other migration variables were created: one representing any type of parental migration (either father or mother migrated, versus

none), and the other representing both parents' migration (both father and mother migrated, versus none). These classifications were based on previous studies conducted in Bangladesh (2).

### **Covariates**

Numerous covariates were carefully selected to adjust potential confounding effects on the association between parental migration and the early childhood development of left-behind children in Bangladesh. The selection of these covariates was based on prior research findings (2, 5, 7-9, 13). The covariates taken into account consist of the child's age, sex, birth order, and health status; household socioeconomic status (SES); maternal education and employment status; as well as the presence of other adult caregivers in the household.

### **Statistical analysis**

Descriptive statistics were utilized to provide a summary of the study population's characteristics, including age, sex, socioeconomic status, and other pertinent variables. To examine the relationship between parental migration status (father migration, mother migration, both parents' migration) and ECDI of left-behind children, multilevel logistic regression analysis was conducted, controlling for covariates. The decision to employ a multilevel logistic regression model was based on the hierarchical structure of the MICS data, where individuals were nested within households, and households were nested within clusters. This nesting structure resulted in a linkage between individual responses, rendering simple logistic regression inadequate for producing accurate results. In contrast, the multilevel logistic regression model was deemed the recommended approach for generating more robust outcomes (16). The findings were reported as odds ratios (OR) with 95% confidence intervals (95% CI). A p-value of less than 0.05 was considered statistically significant. All analyses were performed using the statistical package STATA version 15.1.

**Ethics approval and consent to participate:** The survey data analysed in this study is part of the Demographic and Health Survey programme conducted in 88 countries around the world. The survey was approved by the institutional review board of ICF, USA and the National Research Ethics Committee of the Bangladesh Medical Research Council. Informed consent was obtained from all participants and/or their parents/guardians, where applicable. All necessary patient/participant consent has been obtained and the appropriate institutional forms have been archived. No separate ethical approval was required to conduct this study. We obtained permission to access this survey and conduct this research. All methods were performed in accordance with the relevant guidelines and regulations.

## Results

### *Background characteristics of the respondents*

The background characteristics of the respondents are presented in Table 1. The study included an almost equal number of children aged 24-36 months and 37-48 months, as well as an equal distribution of males and females. Approximately 18% of the total children participated in early childhood education. It was found that around 45% of the children's mothers had attained a secondary level of education, while 4% of the children's mothers reported functional difficulties. Roughly one-fourth of the children were from households classified as the poorest. Moreover, about one-fifth of the children resided in rural areas, and Chattogram division was reported as the region of residence by a similar proportion of the children.

**Table 1: Background characteristics of the respondents, Bangladesh, N= 8,833**

| Demographics of children | Percentage (95% CI) |
|--------------------------|---------------------|
| <b>Age (in months)</b>   |                     |
| 24-36                    | 50.3 (49.1-51.6)    |



|                                                |                  |
|------------------------------------------------|------------------|
| 37-48                                          | 49.7 (48.4-50.9) |
| <b>Sex</b>                                     |                  |
| Male                                           | 49.8 (49.0-50.7) |
| Female                                         | 50.2 (49.4-51.0) |
| <b>Attendance in early childhood education</b> |                  |
| No                                             | 82.0 (80.9-83.0) |
| Yes                                            | 18.0 (17.0-19.1) |
| <b>Children mother's education</b>             |                  |
| Pre-primary education                          | 16.7 (15.6-17.9) |
| Primary education                              | 26.7 (25.5-27.9) |
| Secondary education                            | 45.2 (43.9-46.6) |
| Higher education                               | 11.4 (10.6-12.2) |
| <b>Mother's functional difficulties</b>        |                  |
| Has functional difficulties                    | 3.6 (1.5-4.5)    |
| Has no functional difficulties                 | 96.4 (95.9-96.8) |
| <b>Wealth Index</b>                            |                  |
| Poorest                                        | 25.0 (23.7-26.5) |
| Second                                         | 20.8 (19.8-22.0) |
| Middle                                         | 18.2 (17.3-19.3) |
| Fourth                                         | 18.0 (16.9-19.1) |
| Richest                                        | 17.9 (16.7-19.1) |
| <b>Place of residence</b>                      |                  |
| Urban                                          | 20.1 (19.0-21.3) |
| Rural                                          | 79.9 (78.8-81.0) |
| <b>Place of region</b>                         |                  |
| Barishal                                       | 5.6 (5.2-6.0)    |
| Chattogram                                     | 23.5 (22.3-24.6) |
| Dhaka                                          | 22.4 (21.3-23.6) |
| Khulna                                         | 9.4 (8.9-10.0)   |
| Mymensingh                                     | 8.1 (7.3-8.9)    |
| Rajshahi                                       | 11.4 (10.7-12.1) |

|         |                 |
|---------|-----------------|
| Rangpur | 10.3 (9.6-10.9) |
| Sylhet  | 9.4 (8.5-10.4)  |

### ***Distribution of early childhood development and parental migration situation in Bangladesh***

Table 2 presents the distribution of early childhood development and parental migration. The findings revealed that 71% of the total children were found to be developmentally on track in terms of ECDI. In the independent domains of ECDI, approximately 73% and 78% of the total children demonstrated developmental progress in the literacy-numeracy and physical domains, respectively. Around 34% of the total children exhibited developmental progress in the socio-emotional domain, while only 9% were observed to be on track in the learning domain of ECDI. In terms of parental migration, it was found that approximately 9% of the total children had fathers who migrated abroad, while 3.3% had fathers who migrated within the country. The migration of mothers alone accounted for a mere 0.3% of the total children. Additionally, the migration of both parents was reported for only 2% of the total children.

**Table 2:** Descriptive statistics exposure and outcome variables

| <b>Children who are not developmentally track for indicated domains</b> | <b>% (95% CI)</b> |
|-------------------------------------------------------------------------|-------------------|
| <b>Outcome variables</b>                                                |                   |
| Literacy-numeracy                                                       | 73.5 (72.4-74.7)  |
| Physical                                                                | 78.4 (77.3-79.5)  |
| Socio-emotional                                                         | 33.7 (32.5-34.9)  |
| Learning                                                                | 9.1 (8.3-9.9)     |
| Early child development index                                           | 71.0 (69.8-72.1)  |
| <b>Migration status of parents</b>                                      |                   |
| <b>Father migration</b>                                                 |                   |
| Not migrated                                                            | 88.2 (87.3-89.0)  |
| Migrated abroad                                                         | 8.5 (7.8-9.5)     |

|                                  |                  |
|----------------------------------|------------------|
| Migrated within country          | 3.3 (2.9-3.7)    |
| <b>Mother migration</b>          |                  |
| Not migrated                     | 97.7 (97.4-98.2) |
| Migrated abroad                  | 0.3 (0.1-0.04)   |
| Migrated within country          | 2.0 (1.7-2.3)    |
| <b>Migration of both parents</b> |                  |
| No                               | 98.1 (97.8-98.4) |
| Yes                              | 1.9 (1.6-2.2)    |
| <b>Any type of migration</b>     |                  |
| Yes                              | 12.3 (11.5-13.2) |
| No                               | 87.7 (11.5-13.2) |

### *Association between parental migration and early childhood development and its independent domains*

Children with fathers who migrated abroad had significantly decreased odds of being developmentally on track in the literacy-numeracy domain (OR: 0.84, 95% CI: 0.73-0.96), physical domain (OR: 0.88, 95% CI: 0.76-0.99), learning domain (OR: 0.80, 95% CI: 0.70-0.91), and overall ECDI (OR: 0.74, 95% CI: 0.54-0.93). Furthermore, when both parents migrated, a significant association was found with decreased odds of the learning domain (OR: 0.86, 95% CI: 0.55-1.35) and overall ECDI (OR: 0.63, 95% CI: 0.48-0.97). Notably, any type of parental migration exhibited significant associations with decreased odds of being developmentally on track in the literacy-numeracy domain (OR: 0.90, 95% CI: 0.80-0.99), learning domain (OR: 0.83, 95% CI: 0.71-0.98), and overall ECDI (OR: 0.85, 95% CI: 0.77-0.95).

Among the adjusted covariates, it was found that poor early ECDI outcomes were associated with several factors (Supplementary table 1-4). Specifically, children in Barishal division, those who did not attend early childhood education, and children whose mothers had functional difficulties or belonged

to the poorest wealth quintile were found to have lower likelihoods of positive early childhood development. These factors were identified as significant contributors to the observed disparities in ECDI outcomes.

**Table 3: Effects of parental migration on early childhood development in Bangladesh adjusting for covariates.**

|                                  | Literature domain<br>OR, 95% CI | Physical domain<br>OR, 95% CI | Socio-emotional domain<br>OR, 95% CI | Learning domain<br>OR, 95% CI | Overall Early childhood Development Index,<br>OR, 95% CI |
|----------------------------------|---------------------------------|-------------------------------|--------------------------------------|-------------------------------|----------------------------------------------------------|
| <b>Father migration</b>          |                                 |                               |                                      |                               |                                                          |
| Not migrated                     | 1.00                            | 1.00                          | 1.00                                 | 1.00                          | 1.00                                                     |
| Migrated abroad                  | 0.84 (0.73-0.96)**              | 0.88 (0.76-0.99)**            | 1.03 (0.92-1.17)                     | 0.80 (0.70-0.91)**            | 0.74 (0.54-0.93)**                                       |
| Migrated within country          | 1.03 (0.83-1.27)                | 1.00 (0.82-1.23)              | 0.97 (0.81-1.17)                     | 0.97 (0.80-1.18)              | 0.97 (0.79-1.17)                                         |
| <b>Mother migration</b>          |                                 |                               |                                      |                               |                                                          |
| Not migrated                     | 1.00                            | 1.00                          | 1.00                                 | 1.00                          | 1.00                                                     |
| Migrated abroad                  | 1.43 (0.72-2.82)                | 1.26 (0.66-2.41)              | 1.30 (0.67-2.52)                     | 0.69 (0.28-1.69)              | 1.51 (0.82-2.75)                                         |
| Migrated within country          | 1.16 (0.87-1.54)                | 0.83 (0.62-1.10)              | 0.94 (0.74-1.20)                     | 0.90, 0.61-1.31               | 0.80 (0.61-1.05)                                         |
| <b>Migration of both parents</b> |                                 |                               |                                      |                               |                                                          |
| No                               | 1.00                            | 1.00                          | 1.00                                 | 1.00                          | 1.00                                                     |
| Yes                              | 1.15 (0.83-1.59)                | 0.78 (0.57-1.09)              | 1.04 (0.79-1.37)                     | 0.86 (0.55-1.35)              | 0.63 (0.48-0.97)**                                       |
| <b>Any type of migration</b>     |                                 |                               |                                      |                               |                                                          |
| No                               | 1.00                            | 1.00                          | 1.00                                 | 1.00                          | 1.00                                                     |
| Migrated one of the parents      | 0.90 (0.80-0.99)**              | 0.92 (0.82-1.04)              | 1.01 (0.91-1.12)                     | 0.83 (0.71-0.98)**            | 0.85 (0.77-0.95)**                                       |

**Notes:** \*\*p<0.05, \*p<0.01

## **Discussion:**

The primary objectives of this study were to examine the impact of parental migration on early childhood development in Bangladesh, specifically focusing on the ECDI and its individual domains. The findings of this study provide compelling evidence of the significant negative effects of parental migration on the developmental outcomes of children in the country. The results indicate that children with fathers who migrated abroad faced notable disadvantages, experiencing a 26% decrease in the likelihood of being developmentally on track overall. This reduction becomes even more pronounced, reaching 37%, when both parents migrate. Furthermore, children whose parents had migrated, irrespective of the type of migration, exhibited a significant 15% decrease in their ECDI scores. These findings underscore the wide-ranging consequences of parental absence due to migration on a child's overall development, emphasizing the critical importance of the early years as these effects can have lifelong implications.

The observed negative correlation between parental migration and poor ECDI scores are comparable to the other study findings in China and other countries (9, 11, 13, 17-19). This relationship can be attributed to several contributing factors. Firstly, children of migrant parents are at an increased risk of facing challenges related to malnutrition, compromised physical health, and unintentional injuries compared to children whose parents do not migrate (19). This disparity arises from the lack of parental involvement and support in fulfilling childcare responsibilities, resulting in inadequate supervision and care for the child's well-being (3). Moreover, the absence of parents due to migration disrupts the crucial parent-child relationship during the formative years, which plays a fundamental role in fostering healthy child development (19). Parental involvement, support, and nurturing are vital for creating a nurturing environment that promotes cognitive, social, and emotional growth (2, 3, 20). When parents are absent for extended periods, children may experience a deficiency in emotional bonding and have

limited opportunities for interactive learning experiences, thus hindering their overall development (1-3).

Furthermore, the emotional strain and stress associated with parental migration can have profound detrimental effects on children's overall well-being (1). The separation from a parent can trigger feelings of anxiety, sadness, and insecurity, significantly impacting their emotional and cognitive functioning (11, 19). These emotional disruptions may manifest as challenges in regulating emotions, forming relationships, and adapting to new environments, ultimately compromising socio-emotional development (19). Another influential factor contributing to the negative association between parental migration and ECDI scores is the economic strain faced by families with migrating parents (8). The financial pressures and the need for remittances to support the family back home can divert attention and resources away from investing in the child's early development (13). Limited financial means may result in reduced access to quality early childhood education, healthcare services, and enriching learning materials, all of which are essential for promoting optimal cognitive and physical development (21, 22). Furthermore, the absence of parents can disrupt the stability of the home environment, leading to alterations in daily routines, changes in caregiver arrangements, and shifts in family dynamics (23, 24). These disruptions introduce stressors and inconsistencies that negatively impact a child's sense of security and stability, potentially hindering their learning progress and overall development (3, 8).

These findings depict a deeply concerning reality in which parents, driven by unwavering hope to secure a brighter future for their children, unknowingly subject them to adverse consequences. In Bangladesh, there is an increasing trend of parents opting for migration, underscoring the urgent need for comprehensive and targeted interventions. It is crucial for policymakers, educators, and practitioners to prioritize the development and implementation of support systems specifically tailored

to address the unique needs of children with migrating parents. Effective initiatives should include the establishment of community-based programs that serve as a lifeline, providing emotional support, counselling services, and educational resources (3). The government's current initiative to ensure early childhood education, which has been found to have a negative association with poor ECDI outcomes in this study, should be strengthened by addressing the existing challenges (25). These challenges include improving poor infrastructure and addressing the shortage of skilled teaching professionals (26). Additionally, it is crucial to prioritize the needs of children from poor households, as they are more likely to have migrating parents and caregivers who may have limited education and knowledge about early childhood care (27). This study also revealed a correlation between poor ECDI outcomes and children from disadvantaged households, aligning with existing data from LMICs (1, 2). Furthermore, it is important to focus on children whose parents have disabilities, as this study identified a link between poor ECDI outcomes and such cases, particularly when one parent is disabled and the other is migrated (28, 29). Taking these factors into consideration and implementing targeted interventions will be vital in addressing the specific challenges faced by these vulnerable children and ensuring their optimal early childhood development. These programs should aim to equip these vulnerable children with the necessary tools to navigate the emotional and developmental challenges that accompany parental migration (2). By ensuring equal access to enriching learning environments, fostering nurturing social interactions, and maintaining consistent routines, children of migrating parents will get the crucial support they desperately require for wholesome development, even in the painful absence of their migrating parents (10).

This study has several strengths, as well as a few limitations. One of the key strengths is that it is the first study in Bangladesh to report on the impact of parental migration status on ECDI. Advanced statistical techniques were employed, and nationally representative survey data were analyzed, taking



into account a range of confounding factors that were selected based on previous literature in low- and middle-income countries. Additionally, the categorization of ECDI followed the recommended guidelines provided by UNICEF. However, a major limitation of this study stems from the analysis of cross-sectional survey data, which means that the reported findings are correlational in nature and not causal. Furthermore, the data recorded in this study relied on self-reported responses with limited options for validating the data. This introduces the possibility of recall bias, although any such bias is likely to be random. Moreover, there are additional factors, such as the quality of early childhood education and dietary patterns, that may impact ECDI and were not considered in the model due to their unavailability in the survey data. Despite these limitations, this study serves to raise awareness among policymakers about the ongoing issue of parental migration and its impact on ECDI. It can inform evidence-based policymaking and the development of programs aimed at reducing the negative effects of parental migration on early childhood development.

## **Conclusion**

Approximately 29% of children aged 3 to 4 years in Bangladesh were found to be not developmentally on track, as measured by the ECDI. The likelihood of poor ECDI outcomes was 26% higher among children with fathers who migrated abroad. This disparity becomes even more significant, reaching 37%, when both parents migrate. These findings indicate a potential risk where approximately one-third of all children in Bangladesh may face lifelong developmental challenges, with a higher likelihood among children whose parents migrate abroad in search of better opportunities for their families and countries. To address this issue, it is crucial to strengthen early childhood education and social safety nets, ensuring comprehensive early childhood development for all children, with a particular focus on the children of migrant parents.

**Consent for publication:** Not applicable

**Availability of data and materials:** The data that support the findings of this study are available from UNICEF, but restrictions apply to the availability of these data, which were used under license for the current study, and so are not publicly available. Data are, however, available from the authors upon reasonable request and with permission of the UNICEF (<https://mics.unicef.org/surveys>).

**Conflict of interest:** The authors declare no conflicts of interest.

**Financial support:** The authors did not receive any specific funds for this study.

**Authors' contribution:** Khanam SJ developed the study concepts, analysed the data, and write first draft of the manuscript. Khan MN critically reviewed and edited the manuscript. Both authors have seen and approved the final version of the paper.

**Acknowledgement:** We are thankful to the Jatiya Kabi Kazi Nazrul Islam University where this study was conducted.

## References

1. Sharma S, Devkota B, Acharya D. Impact of Parental Migration on Health of Left Behind Children. *Global Journal of Health Science*. 2021;13(2):77.
2. Islam MM, Khan MN, Mondal MNI. Does parental migration have any impact on nutritional disorders among left-behind children in Bangladesh? *Public health nutrition*. 2019;22(1):95-103.
3. Fellmeth G, Rose-Clarke K, Zhao C, Busert LK, Zheng Y, Massazza A, Sonmez H, Eder B, Blewitt A, Lertgrai W. Health impacts of parental migration on left-behind children and adolescents: a systematic review and meta-analysis. *The Lancet*. 2018;392(10164):2567-2582.
4. Račaitė J, Lindert J, Antia K, Winkler V, Sketerskienė R, Jakubauskienė M, Wulkau L, Šurkienė G. Parent emigration, physical health and related risk and preventive factors of children left behind: a systematic review of literature. *International journal of environmental research and public health*. 2021;18(3):1167.
5. Behrman J, Iversen A, Sen K. *Social Mobility and Human Capital in Low-and Middle-Income Countries. Social Mobility in Developing Countries: Concepts, Methods, and Determinants*. 2020.
6. Neuman M. Doing more with less: innovations in early childhood development from low-resource contexts. L Miller C Cameron & C Dalli, *The Sage Handbook of early childhood policy*. 2018:236-255.
7. Alderman H, Behrman JR, Glewwe P, Fernald L, Walker S. Evidence of impact of interventions on growth and development during early and middle childhood. *Child and adolescent health and development*. 2017;8:1790.
8. Zhao C, Wang F, Zhou X, Jiang M, Hesketh T. Impact of parental migration on psychosocial well-being of children left behind: a qualitative study in rural China. *International Journal for Equity in Health*. 2018;17(1):1-10.
9. Adhikari R, Jampaklay A, Chamrathirong A, Richter K, Pattaravanich U, Vapattanawong P. The impact of parental migration on the mental health of children left behind. *Journal of immigrant and minority health*. 2014;16:781-789.
10. Chen R, Zhou L. Parental migration and psychological well-being of children in rural China. *International Journal of Environmental Research and Public Health*. 2021;18(15):8085.
11. Liang Z, Sun F. The lasting impact of parental migration on children's education and health outcomes. *Demographic Research*. 2020;43:217-244.
12. Raturi R, Cebotari V. The impact of parental migration on psychological well-being of children in Ghana. *Journal of Ethnic and Migration Studies*. 2023;49(1):192-211.
13. Xie W, Sandberg J, Uretsky E, Hao Y, Huang C. Parental Migration and Children's Early Childhood Development: A Prospective Cohort Study of Chinese Children. *Population Research and Policy Review*. 2021:1-30.
14. unicef. Early childhood development: For every child, early moments matter. Accessed June. 2017;29:2020.
15. Loizillon A, Petrowski N, Britto P, Cappa C. Development of the early childhood development index in MICS surveys. *MICS methodological papers*. 2017;(6).
16. Khan HR, Shaw E. Multilevel logistic regression analysis applied to binary contraceptive prevalence data. *Journal of Data Science*. 2011;9:93-110.
17. Yue A, Bai Y, Shi Y, Luo R, Rozelle S, Medina A, Sylvia S. Parental migration and early childhood development in rural China. *Demography*. 2020;57(2):403-422.

18. Zhong J, Kuhn L, Wang T, Liu C, Luo R. The interrelationships between parental migration, home environment, and early child development in rural China: a cross-sectional study. *International Journal of Environmental Research and Public Health*. 2020;17(11):3862.
19. Chang R, Li C, Qi H, Zhang Y, Zhang J. Birth and health outcomes of children migrating with parents: a systematic review and meta-analysis. *Frontiers in Pediatrics*. 2022;10.
20. Đurišić M, Bunijevac M. Parental involvement as a important factor for successful education. *Center for Educational Policy Studies Journal*. 2017;7(3):137-153.
21. Unicef. Learning through play: Strengthening learning through play in early childhood education programmes. Lego Foundation. 2018.
22. Wildova R, Kropáčková J. Early childhood pre-reading literacy development. *Procedia-Social and Behavioral Sciences*. 2015;191:878-883.
23. Crosnoe R, Prickett KC, Smith C, Cavanagh S. Changes in young children's family structures and child care arrangements. *Demography*. 2014;51(2):459-483.
24. Sandstrom H, Huerta S. The Negative effects of instability on child development: a research Synthesis. 2013.
25. Sikder S, Banu LFA. Early childhood care and education in Bangladesh: a review of policies, practices and research. *International handbook of early childhood education*. 2018:569-587.
26. AUZ A. Early Childhood Education in Bangladesh Dhaka, Bangladesh. : 2022. <https://bdeduarticle.com/early-childhood-education-in-bangladesh/>.
27. Vadivel B, Alam S, Nikpoo I, Ajanil B. The Impact of Low Socioeconomic Background on a Child's Educational Achievements. *Education Research International*. 2023;2023.
28. Lakdawala LK, Bharadwaj P. The relationship between parental disability and child outcomes: Evidence from veteran Families. *Plos one*. 2022;17(11):e0275468.
29. Organization WH. Early childhood development and disability: A discussion paper. 2012.
